# Supplementary material
Source: MDPI journal article supplement (https://www.mdpi.com/2076-3417/13/5/2819)
Supplement: s1 [file s1 › applsci-2240106-supplementary.pdf]

*Supplementary material*

# **Optimized isolation procedure for the extraction of bioactive compounds from spent coffee grounds**

**Theodoros Chatzimitakos, Vassilis Athanasiadis \*, Konstantina Kotsou, Dimitrios Palaiogiannis, Eleni Bozinou, Stavros I. Lalas**

Department of Food Science & Nutrition, University of Thessaly, Terma N. Temponera str., GR-43100 Karditsa, Greece

\*Correspondence: [vaathanasiadis@uth.gr](mailto:vaathanasiadis@uth.gr); Tel.: +30-24410-64783

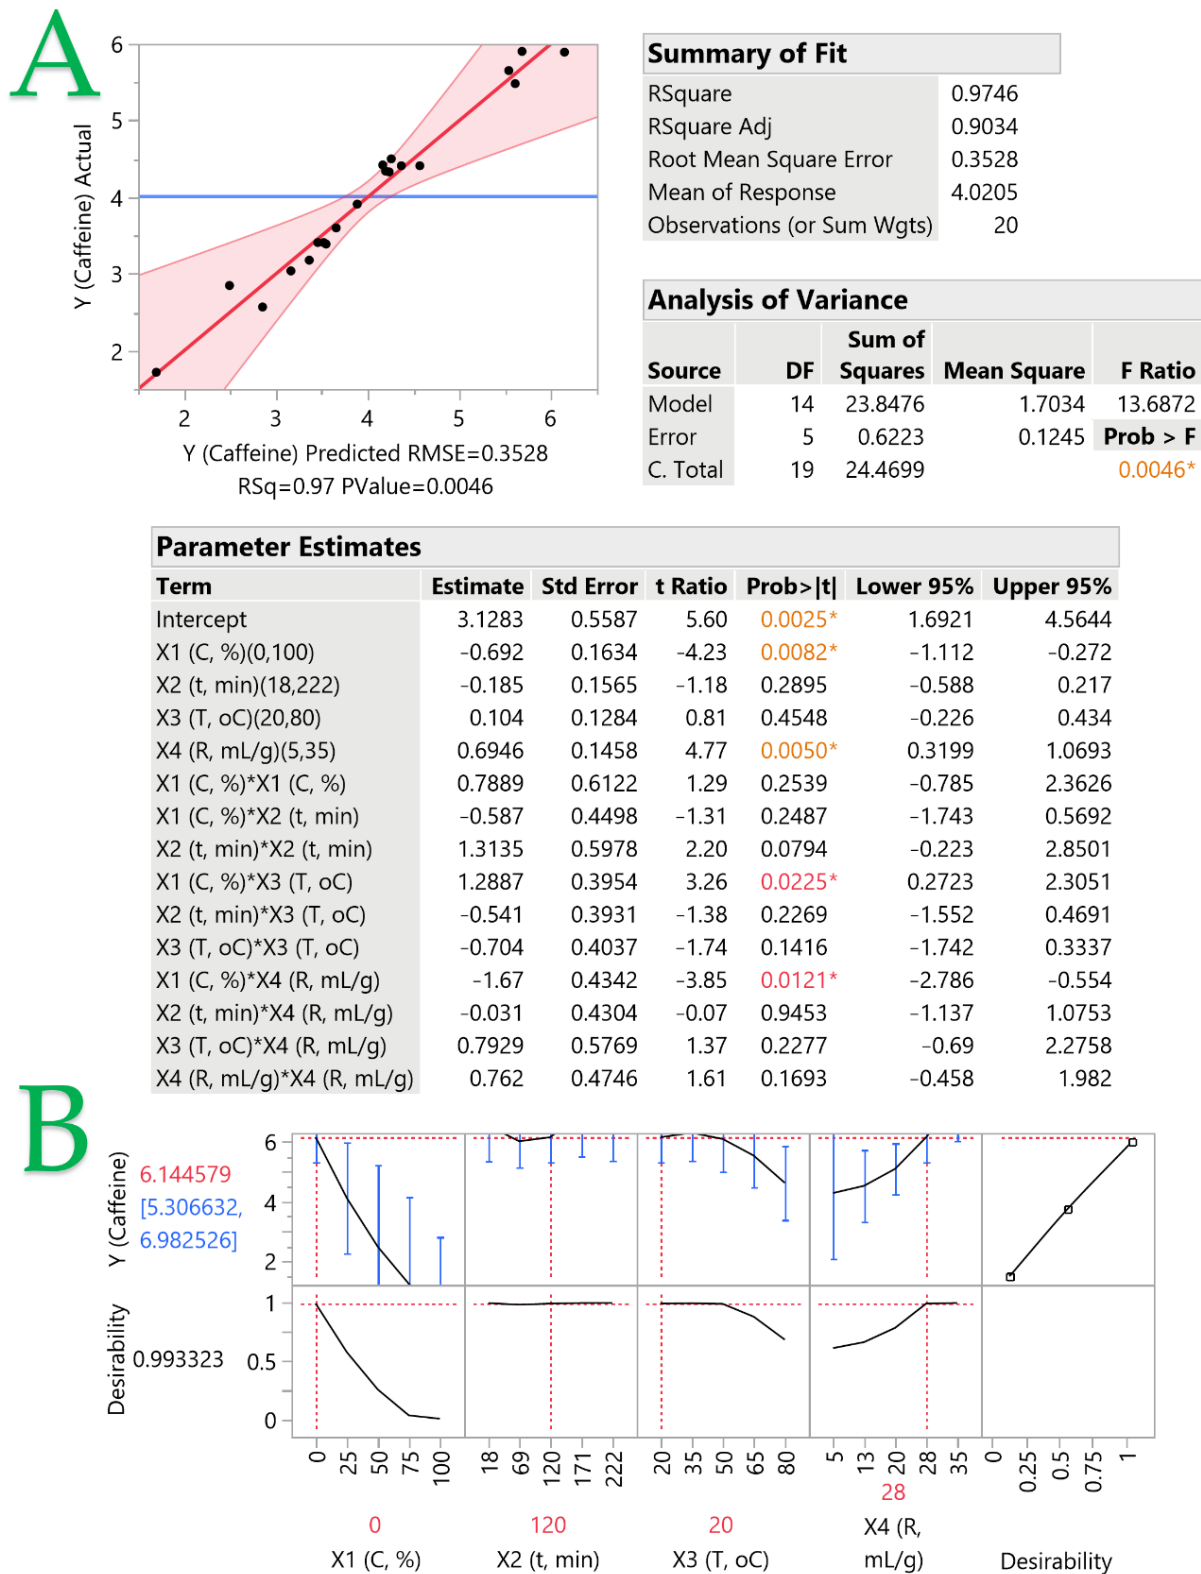

**Figure S1.** Plot of actual *vs* predicted response (Caffeine, mg/g) (plot A) and desirability function (plot B) for the optimization of extraction of spent coffee grounds performed with hydroethanolic solutions. The inset tables provide statistics related to the evaluation of the resulting model. Values with color and asterisk are statistically significant.

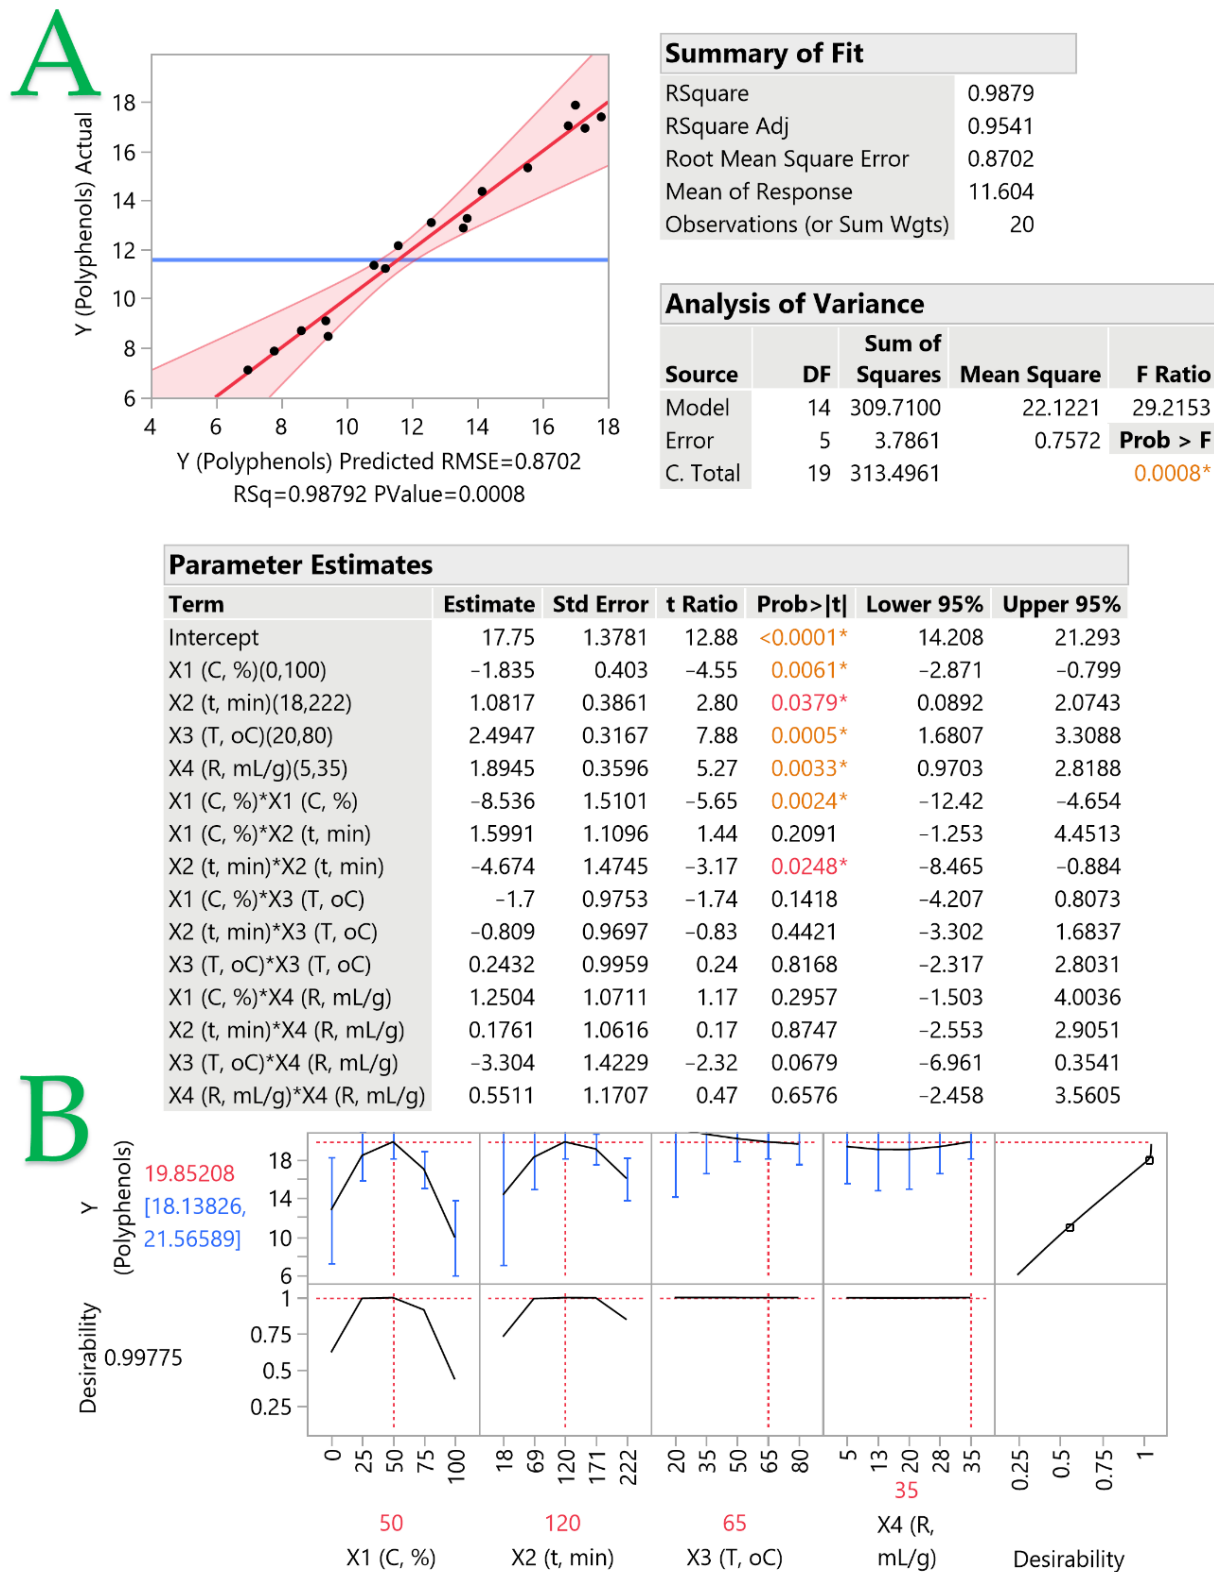

**Figure S2.** Plot of actual *vs* predicted response (Polyphenols, mg GAE/g) (plot A) and desirability function (plot B) for the optimization of extraction of spent coffee grounds performed with hydroethanolic solutions. The inset tables provide statistics related to the evaluation of the resulting model. Values with color and asterisk are statistically significant.

A

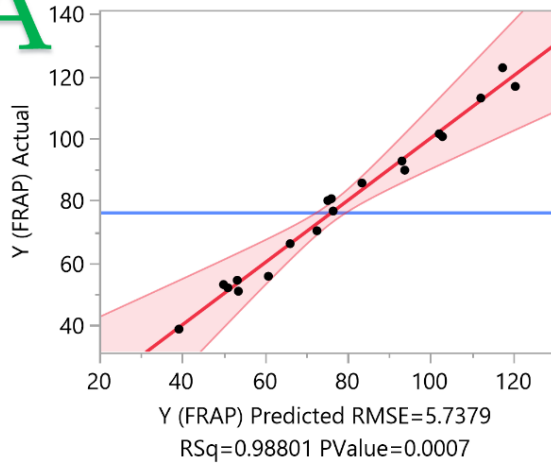

### Summary of Fit

|                            |        |
|----------------------------|--------|
| RSquare                    | 0.988  |
| RSquare Adj                | 0.9545 |
| Root Mean Square Error     | 5.7379 |
| Mean of Response           | 76.326 |
| Observations (or Sum Wgts) | 20     |

### Analysis of Variance

| Source   | DF | Sum of Squares | Mean Square | F Ratio            |
|----------|----|----------------|-------------|--------------------|
| Model    | 14 | 13,568.516     | 969.180     | 29.4377            |
| Error    | 5  | 164.615        | 32.923      | <b>Prob &gt; F</b> |
| C. Total | 19 | 13,733.131     |             | <b>0.0007*</b>     |

### Parameter Estimates

| Term                      | Estimate | Std Error | t Ratio | Prob> t            | Lower 95% | Upper 95% |
|---------------------------|----------|-----------|---------|--------------------|-----------|-----------|
| Intercept                 | 112.72   | 9.0869    | 12.40   | <b>&lt;0.0001*</b> | 89.362    | 136.08    |
| X1 (C, %)(0,100)          | -15.49   | 2.6574    | -5.83   | <b>0.0021*</b>     | -22.32    | -8.661    |
| X2 (t, min)(18,222)       | 6.9922   | 2.546     | 2.75    | <b>0.0405*</b>     | 0.4476    | 13.537    |
| X3 (T, oC)(20,80)         | 16.335   | 2.0882    | 7.82    | <b>0.0005*</b>     | 10.968    | 21.703    |
| X4 (R, mL/g)(5,35)        | 13.165   | 2.3709    | 5.55    | <b>0.0026*</b>     | 7.0702    | 19.259    |
| X1 (C, %)*X1 (C, %)       | -52.08   | 9.9575    | -5.23   | <b>0.0034*</b>     | -77.67    | -26.48    |
| X1 (C, %)*X2 (t, min)     | 16.819   | 7.3165    | 2.30    | 0.0699             | -1.988    | 35.627    |
| X2 (t, min)*X2 (t, min)   | -32.65   | 9.7226    | -3.36   | <b>0.0201*</b>     | -57.65    | -7.661    |
| X1 (C, %)*X3 (T, oC)      | -8.965   | 6.4309    | -1.39   | 0.2221             | -25.5     | 7.5667    |
| X2 (t, min)*X3 (T, oC)    | -12.96   | 6.3941    | -2.03   | 0.0984             | -29.4     | 3.4734    |
| X3 (T, oC)*X3 (T, oC)     | 0.5467   | 6.5666    | 0.08    | 0.9369             | -16.33    | 17.427    |
| X1 (C, %)*X4 (R, mL/g)    | 7.9628   | 7.0624    | 1.13    | 0.3107             | -10.19    | 26.117    |
| X2 (t, min)*X4 (R, mL/g)  | -8.744   | 7         | -1.25   | 0.2669             | -26.74    | 9.2498    |
| X3 (T, oC)*X4 (R, mL/g)   | -16.74   | 9.3824    | -1.78   | 0.1345             | -40.85    | 7.3825    |
| X4 (R, mL/g)*X4 (R, mL/g) | 10.66    | 7.7195    | 1.38    | 0.2258             | -9.183    | 30.504    |

B

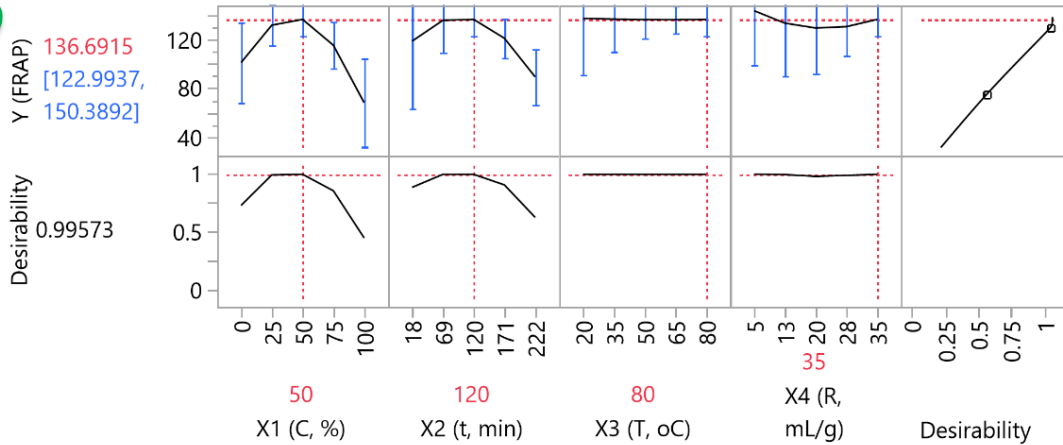

**Figure S3.** Plot of actual *vs* predicted response (FRAP,  $\mu\text{mol AAE/g}$ ) (plot A) and desirability function (plot B) for the optimization of extraction of spent coffee grounds performed with hydroethanolic solutions. The inset tables provide statistics related to the evaluation of the resulting model. Values with color and asterisk are statistically significant.

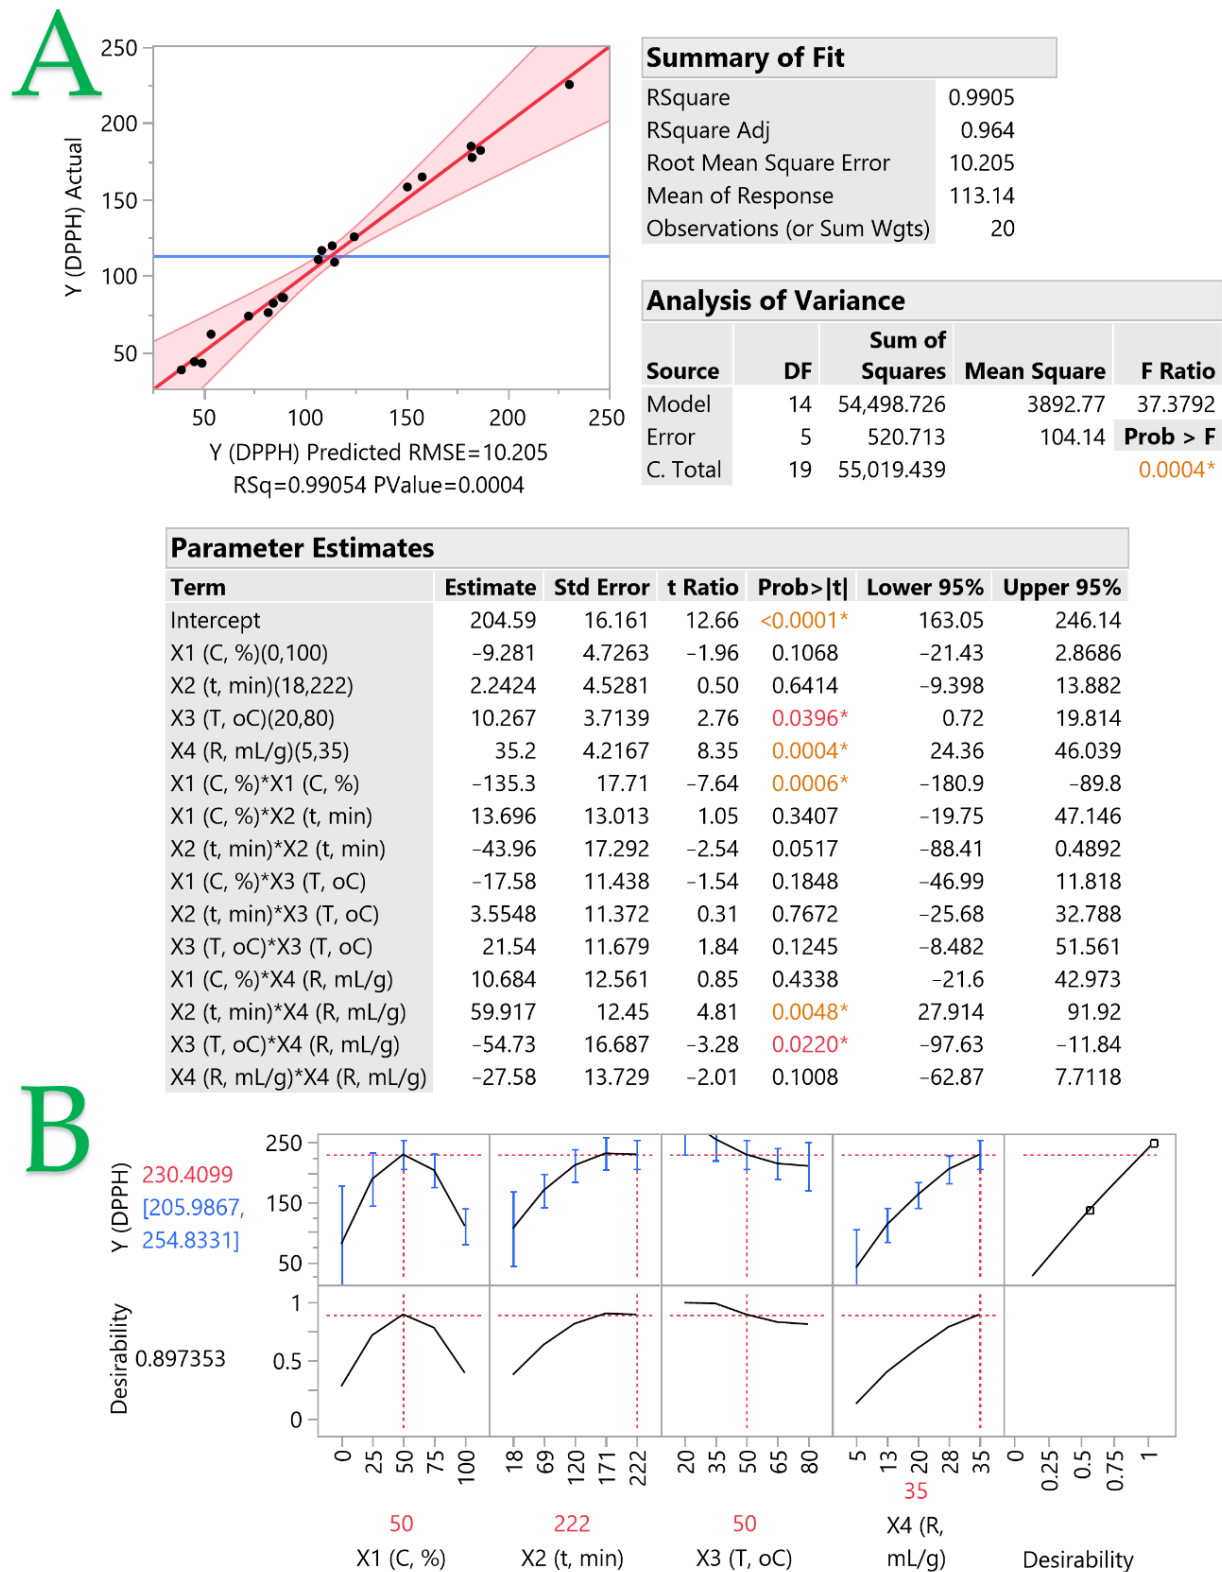

**Figure S4.** Plot of actual *vs* predicted response (DPPH,  $\mu\text{mol DPPH/g}$ ) (plot A) and desirability function (plot B) for the optimization of extraction of spent coffee grounds performed with hydroethanolic solutions. The inset tables provide statistics related to the evaluation of the resulting model. Values with color and asterisk are statistically significant.

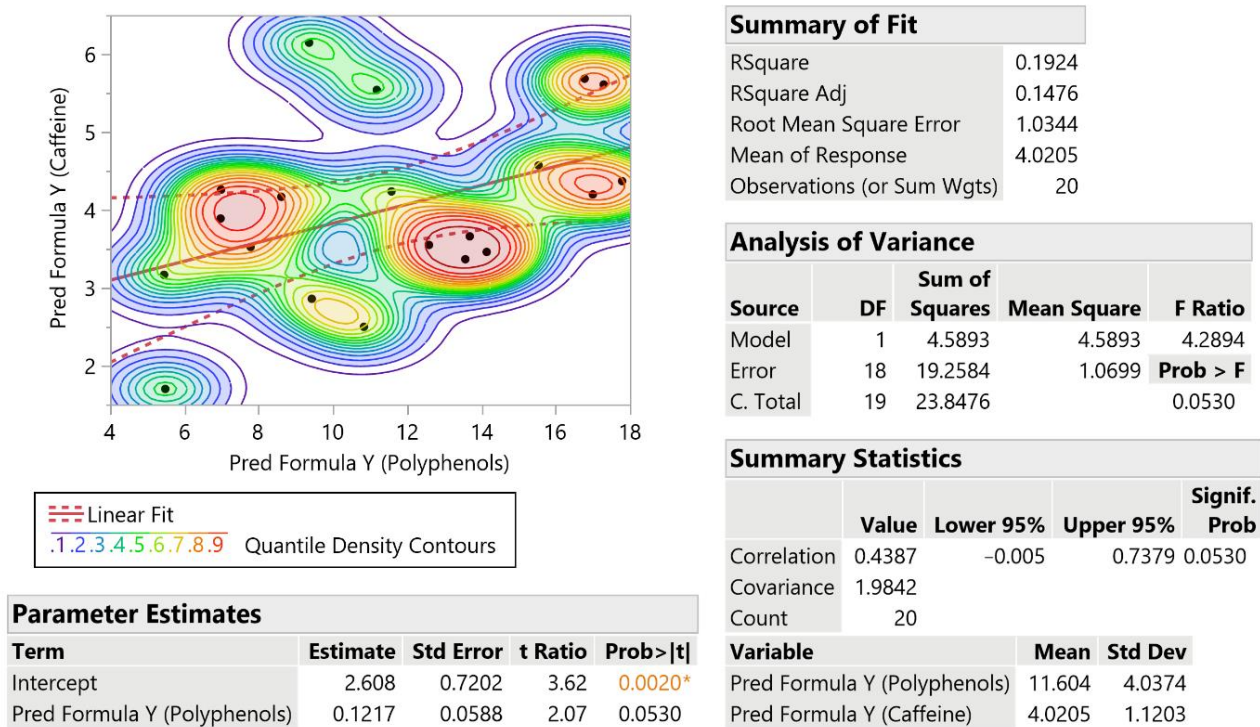

**Figure S5.** Bivariate response fitting plot (Caffeine *vs* Polyphenols) for the optimization of spent coffee grounds extraction performed with hydroethanolic solutions. The inset tables provide statistics related to the evaluation of the resulting model. Values with color and asterisk are statistically significant.

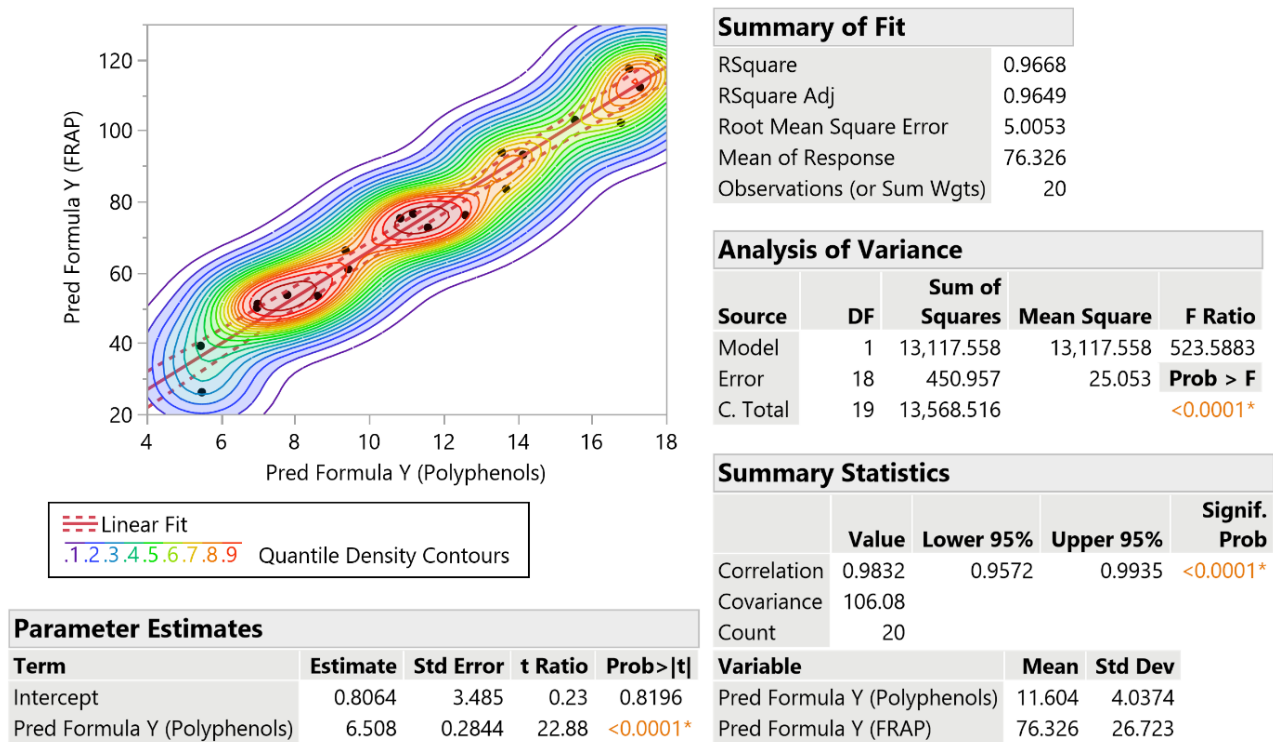

**Figure S6.** Bivariate response fitting plot (FRAP *vs* Polyphenols) for the optimization of spent coffee grounds extraction performed with hydroethanolic solutions. The inset tables provide statistics related to the evaluation of the resulting model. Values with color and asterisk are statistically significant.

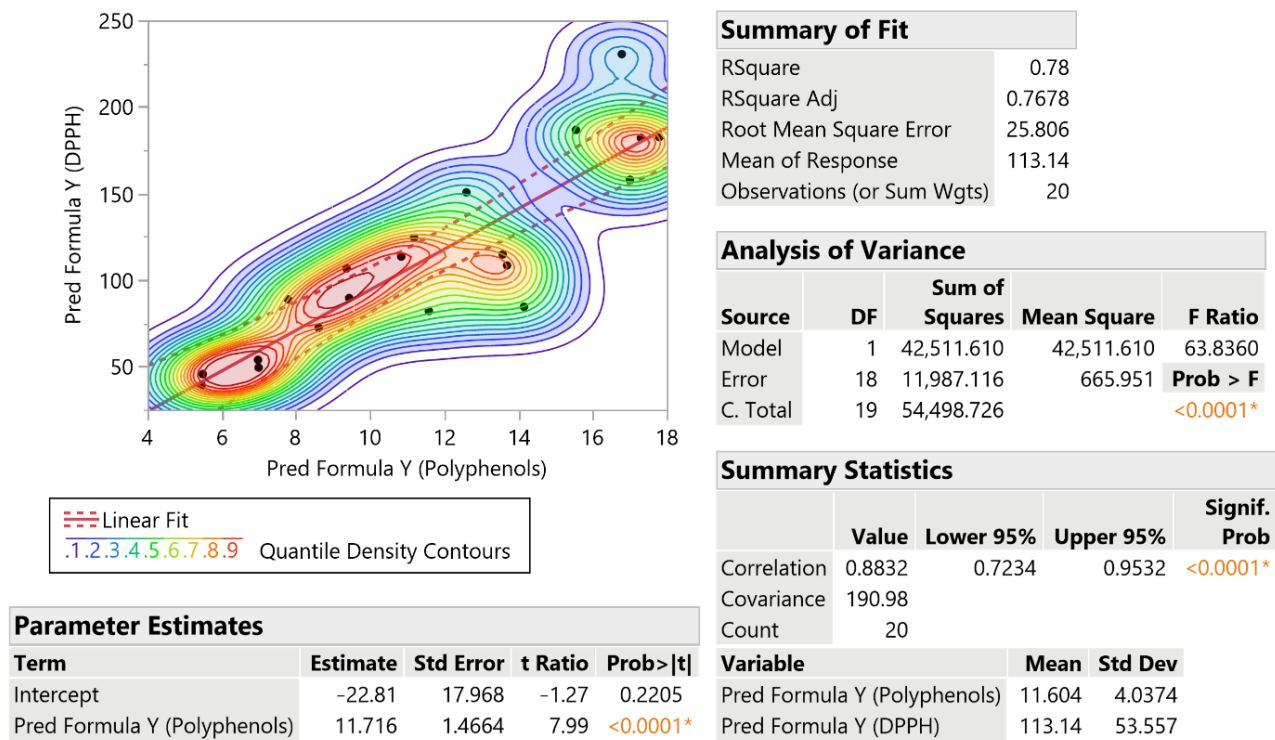

**Figure S7.** Bivariate response fitting plot (DPPH *vs* Polyphenols) for the optimization of spent coffee grounds extraction performed with hydroethanolic solutions. The inset tables provide statistics related to the evaluation of the resulting model. Values with color and asterisk are statistically significant.
